# Supplementary material
Source: Research Square preprint supplement (doi:10.21203/rs.3.rs-9399556/v1)
Supplement: Supplementary file 1 [file a90694b0c9fcc233d2a7abb0.xlsx]

## Sheet: Sheet1
TABLE. Summary Cases of the Endoscopic Occipital Transtentorial Transrecess Approach for Third Ventricle lesions
No	Sex/age(y)	Presentation	Max diameter	Tumor Side	Approach side	Tumor Location	hydrocephalus(treatment)	Resection results	Pathology	PreOP KPS	PostOP KPS
1	F/28	Headache and dizziness	2.4cm	Left	Right	Posterior part	Y (NA)	GTR	LGG (WHO II)	90	100
2	M/57	Headache and tinnitus	2.6cm	Left-middle	Right	Posterior part	Y (Pre-ETV)	GTR	LGG (WHO I)	80	90
3	F/51	Headache and left mild hemiplegia	1.4cm	Right	Left	Posterior part	N(NA)	GTR	Cavernous malformation	80	100
4	F/59	Headache and 4 previously ventricle hemorrhage	2.3cm	Middle	Left	Anterior and posterior part	Y (Intra-lamina terminalis fenestration)	GTR	Cavernous malformation	80	100
5	M/38	Headache and vomiting	2.9cm	Middle	Left	Posterior part	Y (Intra-ETV,and lamina terminalis fenestration)	STR	Diffuse midline glioma(WHO IV)	50	70
6	F/54	Impaired vision	4.7cm	Left-middle	Right	Anterior and posterior part	N(NA)	STR	Craniopharyngioma	80	80
7	M/60	Memory decline and sluggishness	3.9cm	Middle	Left	Anterior and posterior part	N(NA)	STR	Craniopharyngioma	80	70
8	M/56	Impaired vision	4.2cm	Middle	Left	Anterior and posterior part	N(NA)	GTR	Craniopharyngioma	80	90
9	M/56	Left limb and face numbness	1.3cm	Right	Left	Posterior part	N(NA)	GTR	Cavernous malformation	90	100
10	F/40	Headache and nausea	4.5cm	Middle	Left	Posterior part	Y (NA)	STR	Glioma(WHO III)	70	80
